# Supplementary material for: Direct analysis of radium-226 in sediment by ICP-MS: an analytical challenge?
Source: Royal Society of Chemistry journal article supplement (doi:10.1039/c9ja00156e), 2019-01-01
Supplement: c9ja00156e1.pdf [file c9ja00156e1.pdf]

**Supporting information for:**

**Direct analysis of radium-226 in sediment by ICP-MS after a simple acidic digestion: an analytical challenge?**

Hamza Ben Yaala, Rihab Fniter, Delphine Foucher, Olivier Clarisse\*

*Chemistry and Biochemistry Department, Moncton University,*

*18 Antonine Maillet Avenue, Moncton, NB, Canada E1A 3E9*

\* Corresponding author: Tel. +1 506 858 4313, Fax. +1 506 858 4541

E-mail: [olivier.clarisse@umoncton.ca](mailto:olivier.clarisse@umoncton.ca)

Number of pages: 8

Number of tables: 4

Number of figures: 2

**ICP-MS multi-element measurement procedure:**

Elemental measurements (Li, Be, Na, Mg, Al, P, K, Ca, Sc, Ti, V, Cr, Mn, Fe, Co, Ni, Cu, Zn, As, Rb, Sr, Y, Mo, Rh, Ag, Cd, In, Sb, Te, Cs, Ba, La, Ce, Eu, Tb, Ho, Lu, W, Pt, Hg, Tl, Pb, Bi, Th and U) were realized in sediment digest on our ICP-MS instrument with a conventional Peltier-cooled cyclonic spray chamber as an introduction system. Polyatomic and isobaric interferences were minimized using the collision cell configuration of the kinetic energy discrimination (KED) mode of the instrument with He as a collision gas. Internal standard solution used for that purpose was Indium  $^{115}\text{In}$  ( $5 \mu\text{g L}^{-1}$ ) in 2% v/v  $\text{HNO}_3$ . Measurements of these elements were validated using certified reference materials: IAEA-158, IAEA-314, HISS-1 and PACS-2. Recoveries of all elements of interest in certified reference material were comprised between 80% and 111%.

**Table SI-1.** Concentrations ( $\mu\text{g g}^{-1}$ ) of all elements of interest in the five sediments of this study. Results given in brackets are % recovery compared to certified values.

| <b>Element</b> | <b>IAEA-314</b> | <b>IAEA-158</b> | <b>KB-5</b> | <b>RSC</b> | <b>Kaštela</b> |
|----------------|-----------------|-----------------|-------------|------------|----------------|
| Li, lithium    | 14.15           | 30.32 (93)      | 31.82       | 53.31      | 59.42          |
| Be, beryllium  | 1.60            | 1.81            | 1.36        | 1.87       | 2.15           |
| Na, sodium     | 789             | 22 682 (95)     | 12 154      | 17 760     | 18 164         |
| Mg, magnesium  | 2 303           | 10 074 (97)     | 8 998       | 10 265     | 27 456         |
| Al, aluminium  | 87 629          | 47 100 (91)     | 61 362      | 59 620     | 56 999         |
| P, phosphorus  | 600             | 963             | 754         | 619        | 729            |
| K, potassium   | 14 138          | 19 393 (97)     | 14 407      | 20 014     | 7 830          |
| Ca, calcium    | 1 860           | 66 989 (103)    | 12 678      | 3 439      | 118 050        |
| Sc, scandium   | 16.19           | 7.69 (92)       | 12.59       | 11.15      | 10.08          |
| Ti, titanium   | 5 283           | 3 382 (97)      | 4 787       | 5 162      | 2 835          |
| V, vanadium    | 169.1           | 72.5 (99)       | 99.7        | 86.1       | 234.1          |
| Cr, chromium   | 82.8            | 69.5 (93)       | 100.9       | 58.7       | 110.4          |
| Mn, manganese  | 128.2           | 348.8 (98)      | 914.7       | 436.7      | 408.5          |
| Fe, iron       | 29 282          | 25 937 (99)     | 39 812      | 39 801     | 37 990         |
| Co, cobalt     | 18.46           | 8.43 (92)       | 13.27       | 12.55      | 11.57          |
| Ni, nickel     | 49.57           | 28.81 (95)      | 39.79       | 32.54      | 83.01          |
| Cu, copper     | 44.7            | 43.8 (91)       | 33.5        | 21.0       | 52.8           |
| Zn, zinc       | 75              | 142 (101)       | 104         | 92         | 173            |
| As, arsenic    | 18.60           | 10.39 (90)      | 8.74        | 9.74       | 25.54          |
| Rb, rubidium   | 90.5            | 77.1 (94)       | 63.5        | 92.3       | 50.9           |
| Sr, strontium  | 25              | 468 (99)        | 133         | 88         | 487            |
| Y, yttrium     | 24.91           | 15.52           | 27.11       | 22.32      | 22.18          |
| Mo, molybdenum | 32.12           | 4.75            |             | 5.79       | 17.00          |
| Rh, rhodium    | <0.04           | <0.04           | <0.04       | <0.04      | <0.04          |
| Ag, silver     | 0.07            | 0.20 (111)      | 0.11        | 0.12       | 0.26           |
| Cd, cadmium    | 0.080           | 0.370 (100)     | 0.399       | 0.467      | 2.771          |
| In, indium     | 0.026           | 0.162           | 0.048       | 0.049      | 0.082          |
| Sb, antimony   | 0.42            | 1.43 (107)      | 0.51        | 0.66       | 3.29           |
| Te, tellurium  | 0.119           | 0.040           | 0.037       | 0.033      | 0.100          |
| Cs, caesium    | 3.44            | 3.28 (88)       | 2.48        | 4.66       | 6.44           |
| Ba, barium     | 208.7           | 1 013.5 (99)    | 389.3       | 277.3      | 359.1          |
| La, lanthanum  | 119.84          | 27.29 (90)      | 30.24       | 31.11      | 28.67          |
| Ce, cerium     | 222.8           | 55.1 (90)       | 72.1        | 66.6       | 53.9           |

|              |             |            |        |        |        |
|--------------|-------------|------------|--------|--------|--------|
| Eu, europium | 1.744       | 0.977 (91) | 1.451  | 1.259  | 0.993  |
| Tb, terbium  | 1.594       | 0.560 (89) | 0.914  | 0.789  | 0.672  |
| Ho, holmium  | 1.2155      | 0.6551     | 1.1440 | 0.9560 | 0.7538 |
| Lu, lutetium | 0.444       | 0.243 (80) | 0.453  | 0.366  | 0.337  |
| W, tungsten  | 5.0         | 1.1        | 2.3    | 1.3    | 1.2    |
| Pt, platinum | < 0.07      | < 0.07     | < 0.07 | < 0.07 | < 0.07 |
| Hg, mercury  | -           | 0.132      | -      | -      | -      |
| Tl, thallium | 0.37        | 0.59       |        | 0.58   | 1.58   |
| Pb, lead     | 15.7        | 40.6 (102) | 20.1   | 20.4   | 66.7   |
| Bi, bismuth  | 0.229       | 0.232      | 0.132  | 0.194  | 0.399  |
| Th, thorium  | 15.91 (89)  | 7.36 (83)  | 8.39   | 8.67   | 9.70   |
| U, uranium   | 50.396 (89) | 2.242 (93) | 2.787  | 4.605  | 41.388 |

IAEA-158: Marine sediment, International Atomic Energy Agency (Vienna, Austria)

IAEA-314: Stream sediment, International Atomic Energy Agency (Vienna, Austria)

**Table SI-2.** Concentrations ( $\mu\text{g L}^{-1}$ ) of all elements of interest of the five sediments of this study if 0.10 g sediment was digested to V=50 mL and then 5-fold diluted before ICP-MS analysis.

| Element       | IAEA-314 | IAEA-158 | KB-5  | RSC   | Kaštela |
|---------------|----------|----------|-------|-------|---------|
| Li, lithium   | 5.66     | 12.13    | 12.73 | 21.32 | 23.77   |
| Be, beryllium | 0.64     | 0.72     | 0.54  | 0.75  | 0.86    |
| Na, sodium    | 316      | 9073     | 4862  | 7104  | 7266    |
| Mg, magnesium | 921      | 4030     | 3599  | 4106  | 10982   |
| Al, aluminium | 35052    | 18840    | 24545 | 23848 | 22800   |
| P, phosphorus | 240      | 385      | 302   | 248   | 292     |
| K, potassium  | 5655     | 7757     | 5763  | 8006  | 3132    |
| Ca, calcium   | 744      | 26796    | 5071  | 1376  | 47220   |
| Sc, scandium  | 6.48     | 3.08     | 5.04  | 4.46  | 4.03    |
| Ti, titanium  | 2113     | 1353     | 1915  | 2065  | 1134    |
| V, vanadium   | 67.6     | 29.0     | 39.9  | 34.4  | 93.6    |
| Cr, chromium  | 33.1     | 27.8     | 40.4  | 23.5  | 44.2    |
| Mn, manganese | 51.3     | 139.5    | 365.9 | 174.7 | 163.4   |
| Fe, iron      | 11713    | 10375    | 15925 | 15920 | 15196   |
| Co, cobalt    | 7.38     | 3.37     | 5.31  | 5.02  | 4.63    |
| Ni, nickel    | 19.83    | 11.52    | 15.92 | 13.02 | 33.20   |
| Cu, copper    | 17.9     | 17.5     | 13.4  | 8.4   | 21.1    |
| Zn, zinc      | 30       | 56.8     | 41.6  | 36.8  | 69.2    |

|                |             |         |        |        |         |
|----------------|-------------|---------|--------|--------|---------|
| As, arsenic    | 7.44        | 4.156   | 3.496  | 3.896  | 10.216  |
| Rb, rubidium   | 36.2        | 30.84   | 25.4   | 36.92  | 20.36   |
| Sr, strontium  | 10          | 187.2   | 53.2   | 35.2   | 194.8   |
| Y, yttrium     | 9.96        | 6.21    | 10.84  | 8.93   | 8.87    |
| Mo, molybdenum | 12.85       | 1.90    | -      | 2.32   | 6.80    |
| Rh, rhodium    | <0.02       | <0.02   | <0.02  | <0.02  | <0.02   |
| Ag, silver     | 0.03        | 0.08    | 0.04   | 0.05   | 0.10    |
| Cd, cadmium    | 0.032       | 0.148   | 0.1596 | 0.1868 | 1.1084  |
| In, indium     | 0.010       | 0.065   | 0.019  | 0.020  | 0.033   |
| Sb, antimony   | 0.17        | 0.57    | 0.20   | 0.26   | 1.32    |
| Te, tellurium  | 0.048       | 0.016   | 0.015  | 0.013  | 0.040   |
| Cs, caesium    | 1.38        | 1.31    | 0.99   | 1.86   | 2.58    |
| Ba, barium     | 83.5        | 405.4   | 155.7  | 110.9  | 143.6   |
| La, lanthanum  | 47.94       | 10.92   | 12.10  | 12.44  | 11.47   |
| Ce, cerium     | 89.1        | 22.0    | 28.8   | 26.6   | 21.6    |
| Eu, europium   | 0.698       | 0.391   | 0.580  | 0.504  | 0.397   |
| Tb, terbium    | 0.638       | 0.224   | 0.366  | 0.316  | 0.269   |
| Ho, holmium    | 0.4862      | 0.26204 | 0.4576 | 0.3824 | 0.30152 |
| Lu, lutetium   | 0.178       | 0.097   | 0.181  | 0.146  | 0.135   |
| W, tungsten    | 2.0         | 0.4     | 0.9    | 0.5    | 0.5     |
| Pt, platinum   | <0.03       | <0.03   | <0.03  | <0.03  | <0.03   |
| Hg, mercury    | -           | 0.053   | -      | -      | -       |
| Tl, thallium   | 0.15        | 0.24    | 0.00   | 0.23   | 0.63    |
| Pb, lead       | 6.3         | 16.2    | 8.0    | 8.2    | 26.7    |
| Bi, bismuth    | 0.092       | 0.093   | 0.053  | 0.078  | 0.160   |
| Th, thorium    | 6.36 (89)   | 2.94    | 3.36   | 3.47   | 3.88    |
| U, uranium     | 20.158 (89) | 0.897   | 1.115  | 1.842  | 16.555  |

IAEA-158: Marine sediment, International Atomic Energy Agency (Vienna, Austria)

IAEA-314: Stream sediment, International Atomic Energy Agency (Vienna, Austria)

**Table SI-3.** Instrumental operating conditions of the iCAP-Q ICP-MS and the sample introduction system Apex-Q for radium analysis.

| <i>Instrumental parameters</i> |                           |
|--------------------------------|---------------------------|
| Cool gas flow                  | 14.00 L min <sup>-1</sup> |
| Auxiliary gas                  | 0.80 L min <sup>-1</sup>  |
| RF-power                       | 1550 W                    |

|                                           |                           |
|-------------------------------------------|---------------------------|
| Interface cones                           | Nickel                    |
| <b><i>Ra - Acquisition parameters</i></b> |                           |
| Acquisition runs                          | 5                         |
| Number of sweeps                          | 28                        |
| Integration time per sweep                | 2 seconds                 |
| Total acquisition time                    | 280 seconds               |
| <b><i>Ra - Apex-Q parameters</i></b>      |                           |
| Heated Cyclonic Spray Chamber             | 100°C                     |
| Peltier Cooled Multipass<br>Condenser     | 2°C                       |
| He flow rate                              |                           |
| STD mode                                  | 0 mL min <sup>-1</sup>    |
| KED mode                                  | 4.2 mL min <sup>-1</sup>  |
| Nitrogen. N <sub>2</sub>                  | Off                       |
| Sample uptake rate                        | 0.37 mL min <sup>-1</sup> |
| Internal standard uptake rate             | 0.19 mL min <sup>-1</sup> |

**Table SI-4.** Relative standard deviation (RSD) on <sup>226</sup>Ra concentration measured by ICP-MS in STD and KED mode using <sup>115</sup>In as internal standard based on n sediment replicate mineralization and a matrix matched correction for polyatomic interference.

|                 | <b>STD</b> |         | <b>KED</b> |         |
|-----------------|------------|---------|------------|---------|
| <b>sediment</b> | n          | RSD (%) | n          | RSD (%) |

|                 |   |      |   |      |
|-----------------|---|------|---|------|
| <b>IAEA-314</b> | 5 | 4.6  | 9 | 4.3  |
| <b>Kaštela</b>  | 3 | 4.5  | 3 | 5.1  |
| <b>RSC</b>      | - | -    | 3 | 16.7 |
| <b>IAEA-158</b> | 3 | 15.2 | - | -    |

**Figure SI-1.** Apparent  $^{226}\text{Ra}$  concentration ( $\text{pg L}^{-1}$ ) measured by ICP-MS in STD and KED modes from interfering elemental and bi elemental solutions: a) Pb; b) Ba and Sr; c) Ca and W; and d) Bi

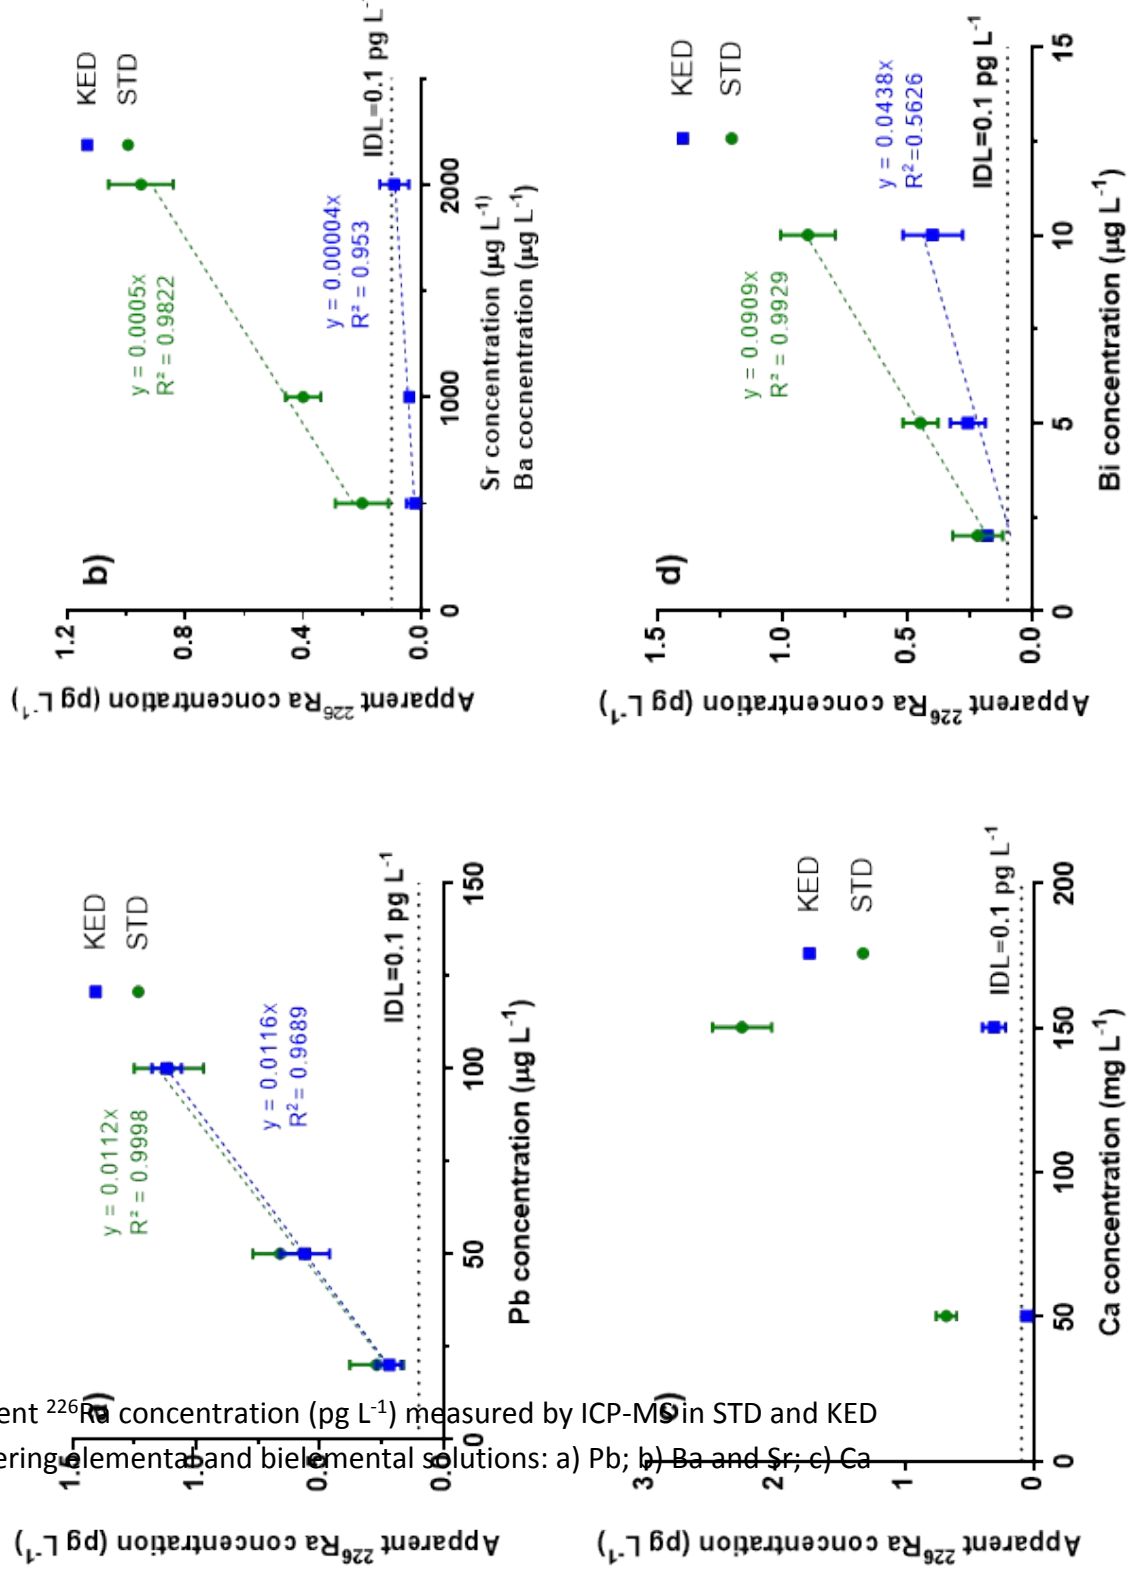



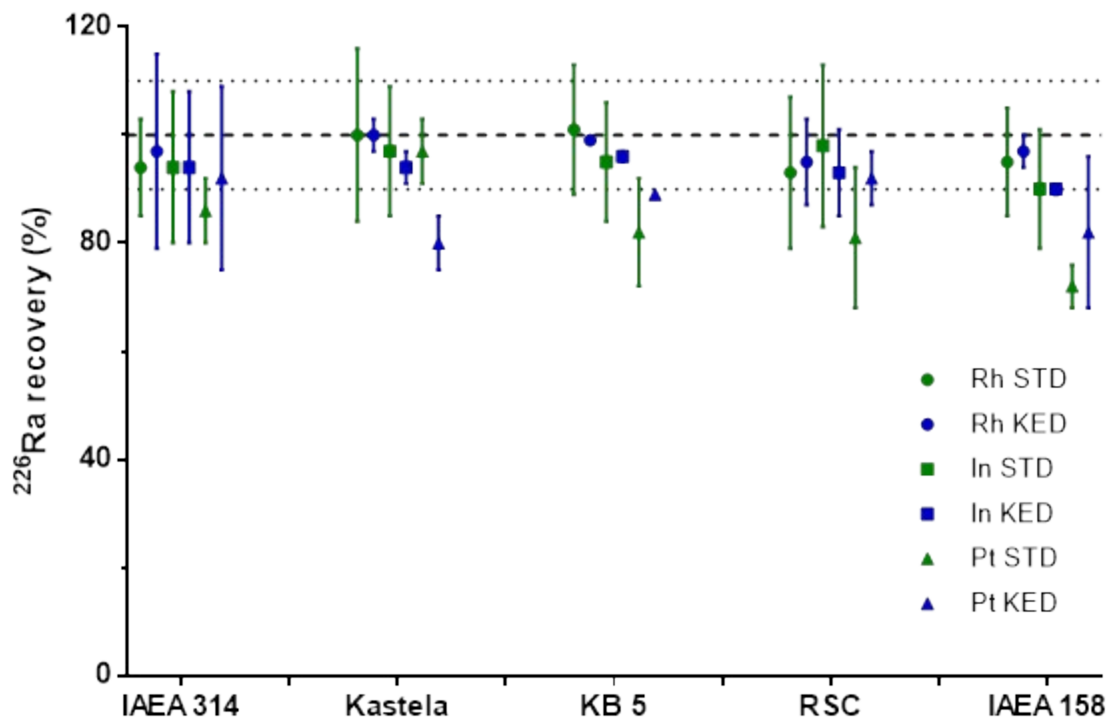

**Figure SI-2.** <sup>226</sup>Ra spike recoveries (% mean ± 1 SD; n = 2 -3) measured in both STD and KED modes using <sup>103</sup>Rh, <sup>115</sup>In or <sup>195</sup>Pt as internal standards after sediment mineralization.
